# Supplementary material for: Passive Magnetic-Flux-Concentrator Based Electromagnetic Targeting System for Endobronchoscopy
Source: MDPI journal article supplement (doi:10.3390/s19235105), 2019-11-21
Supplement: s1 [file s1]

Supplementary Material

# Passive Magnetic-Flux-Concentrator Based Electromagnetic Targeting System for Endobronchoscopy

Chin-Chung Chen <sup>1,#</sup>, Ching-Kai Lin <sup>1,2,3,4,#</sup>, Chen-Wei Chang <sup>1</sup>, Yun-Chien Cheng <sup>1</sup>, Jia-En Chen <sup>1</sup>, Sung-Lin Tsai <sup>1</sup> and Tien-Kan Chung <sup>1,5,\*</sup>

<sup>1</sup> Department of Mechanical Engineering, National Chiao Tung University, Hsinchu 30010, Taiwan; [chinchung.me02g@nctu.edu.tw](mailto:chinchung.me02g@nctu.edu.tw) (C.-C.C.); [vanhalen@ntuh.gov.tw](mailto:vanhalen@ntuh.gov.tw) (C.-K.L.); [wychang.me05g@g2.nctu.edu.tw](mailto:wychang.me05g@g2.nctu.edu.tw) (C.-W.C.); [yccheng@nctu.edu.tw](mailto:yccheng@nctu.edu.tw) (Y.-C.C.); [kh14760.me06g@nctu.edu.tw](mailto:kh14760.me06g@nctu.edu.tw) (J.-E.C.); [peter.me03@g2.nctu.edu.tw](mailto:peter.me03@g2.nctu.edu.tw) (S.-L.T)

<sup>2</sup> Department of Internal Medicine, National Taiwan University Hospital, Taipei 10002 Taiwan

<sup>3</sup> Department of Internal Medicine, National Taiwan University Hospital Hsin-Chu Branch, Hsinchu 30059, Taiwan

<sup>4</sup> Department of Medicine, National Taiwan University Cancer Center, Taipei 10672, Taiwan

<sup>5</sup> International College of Semiconductor Technology, National Chiao Tung University, Hsinchu 30010, Taiwan

\* Correspondence: [tkchung@nctu.edu.tw](mailto:tkchung@nctu.edu.tw); Tel.: 886-3-5712121 #55116

# Co-First Author (Equal Contribution)

## 1. Enlarged Figure of the Figure 7b in Our Paper

Due to the limitation of paper's margin, the value of ruler in Figure 7b in this paper is invisible. Thus, in following (see below Figure S1), we provide the enlarged Figure 7b to show values on the ruler.

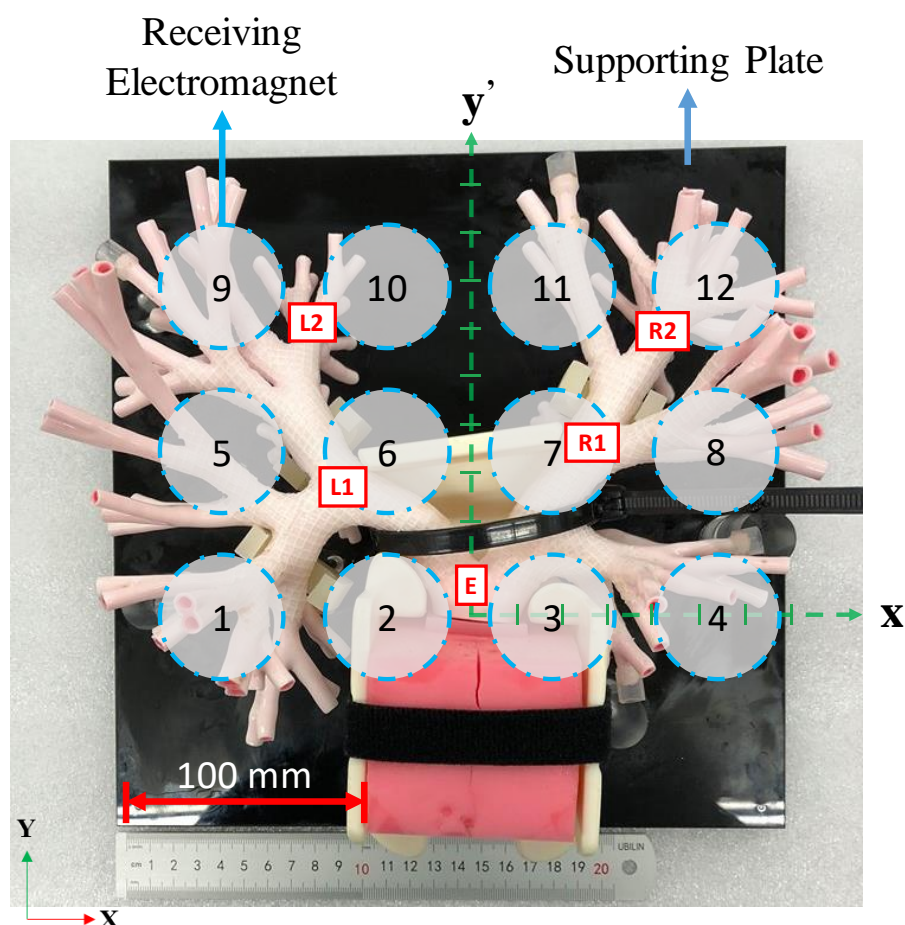

**Figure S1.** The enlarged figure of official/clinical 3D model of bronchus tree for training medical doctors and operators in hospitals: top view showing the relative location between each receiving electromagnet (beneath the model) and each critical entry/intersection location for collar-targeting test (inside the model).

## 2. Detailed Explanations for: Why Every Physical Position Value is Quantized by 5 and How the Accuracy of Physical Position Measurement is. Why Predicted Position Value is Quantized by 10.

The reason for quantized by 5 is due to the measurement method of physical position. As the method in original paper, both coordinate points of predicted location and actual location are determined by using laser-beam measurement. That is, we use the laser pointer to shoot the laser beam through the plane coordinate on the transparent sheet to the actual location. The point on the plane coordinate on the transparent sheet (where the laser beam penetrates through) is the coordinate points of the actual location. In this measurement, because the length of minimum grid in the plane coordinate on the transparent sheet is 5 mm (see below Figure S2), the minimum scale of the plane coordinate is 5 mm accordingly. Thus, every physical position value is quantized by 5 mm. Due to this minimum scale, the accuracy of physical position measurement is also 5 mm.

Regarding the predicted position value, according to the testing procedure in original paper, the direction along length of the electromagnets-array is x-axial direction (see Figure 5c in paper). When we conduct the regression analysis along x-axis, we use 16 points for calculation. Furthermore, the length of electromagnets-array (Note: length between the center of electromagnet no. 1 and electromagnet no. 4) is 150 mm. Due to this, the interval of any of two-neighbor-points along x-axis is 10 mm. Consequently, for example, if the original point is on the electromagnet no. 1, x coordinate points in sequential will be 0, 10, 20, ..., 150 mm, respectively. In fact, in our paper, we set the original point on the center between electromagnet no 2 and no 3. Due to the shift of the original point (which

is 75 mm), the x coordinate points in sequential are subtracted by 75. Therefore, the x coordinate points in sequential become -75, -65, ... 0, ..., 65, 75 mm, respectively. According to this reason, it seems that the estimated values are quantized by 5. However, in fact, the increment of the predicted values is 10 mm.

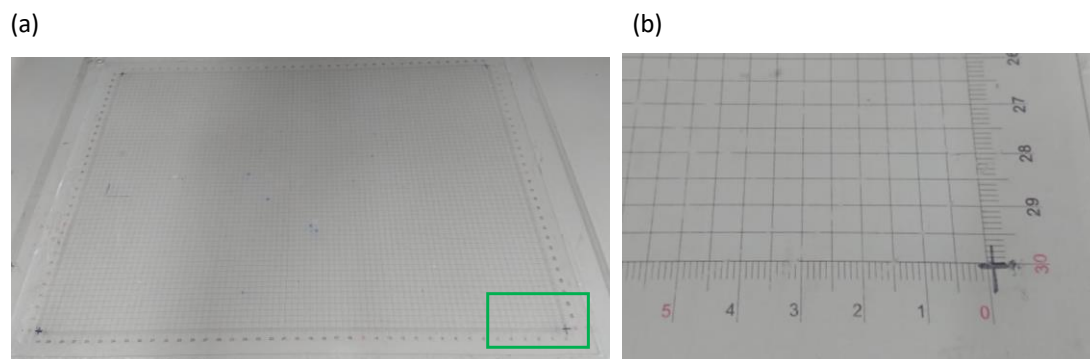

**Figure S2.** The photograph of the plane coordinate on the transparent sheet: (a) side view and (b) enlarged view of the green section in (a).

### 3. The Detailed Method of Regression Analysis and Comparison between Regression Analysis for x-Axis First and y-Axis first.

In following, we provide detailed procedure to explain how we conduct the curve fitting of the regression analysis. Before the curve fitting, due to practical fabrication issue of the electromagnets, voltage output induced by each receiving electromagnet (which is subjected to the same magnetic flux) may be slightly different (i.e., slightly different output under same input). To eliminate the slight difference, we measure the voltage output of receiving electromagnets before the testing. These voltage outputs are defined as “background voltage outputs”, and consequently used to calculate offset value for each electromagnet. After the offset values are obtained, the system is used to target the collar. During the targeting, voltage outputs of electromagnets-array are obtained and subsequently arranged into a data array based on the layout of electromagnets-array, as shown in Figure S3a. In Figure S3a, the  $V_x$  is the measured voltage output of electromagnet no.  $x$ . However, as we mentioned, the slight difference of the electromagnets needs to be eliminated. Thus, the measured voltage output is subtracted by the offset values. After subtraction, we arrange the voltage outputs into another array, as shown in Figure S3b. In Figure S3b, the  $V_{\text{offset-x}}$  is the offset value of the electromagnet no.  $x$ . Next, we pick up subtracted voltage outputs in each row (i.e., along x-axial direction of the system). For example, the row ( $V_1 - V_{\text{offset } 1}$ ,  $V_2 - V_{\text{offset } 2}$ ,  $V_3 - V_{\text{offset } 3}$ ,  $V_4 - V_{\text{offset } 3}$ ) are picked, as shown in the green circle in Figure S3b. After this, we conduct the curve fitting for the picked voltage outputs in each row, respectively. In the curve fitting, because the interval of each point is 1 cm and the length of the electromagnets-array is 150 mm, we import total 16 points (i.e., 0 cm, 10 mm, 20 mm, 30 mm, ..., 150 mm) to estimate the voltage outputs. After the estimation, predicted voltage outputs in each row is obtained (for example, row ( $V_{x(1, 1)}$ ,  $V_{x(1, 2)}$  ...  $V_{x(1, 15)}$ ,  $V_{x(1, 16)}$ ). Consequently, we rearrange these predicted voltage outputs into another array, as shown in figure S3c. In Figure S3c, the  $V_{x(i, j)}$  is the predicted voltage output at row  $i$  and column  $j$  obtained by curve fitting for x-axis. After this, we pick up predicted voltage output in each column (along y-axial direction of the system from  $V_{x(i, j)}$  array), for example, column ( $V_{x(1, 1)}$ ,  $V_{x(2, 1)}$ ,  $V_{x(3, 1)}$ ) as shown in the green circle in Figure S3c. After picking up the column, we use the values in each column to conduct the curve fitting for y-axis, respectively. After the fitting curve for y-axis is obtained, similarly, because the interval of each point is 1 cm and the width of the electromagnets-array is 100 mm, we import 11 points (i.e., points at 0 mm, 1 mm, 2 mm, 3 mm, ..., 100 mm) into the fitting curve for y-axis to calculate the predicted voltage output for each column. After the estimation, the predicted voltage outputs in each column are obtained and shown in Figure S3d (for example, column ( $V_{y(1, 1)}$ ,  $V_{y(2, 1)}$  ...  $V_{y(10, 1)}$ ,  $V_{y(11, 1)}$ ). In Figure S3d, the  $V_{y(i, j)}$  is the predicted voltage output of at row  $i$  and column  $j$  obtained by curve

fitting for y-axis. Finally, the data in  $V_{Y(i, j)}$  array and the corresponding x-y coordinate points are plotted as the results shown in below Figure S4 and the Figure 9 in original paper.

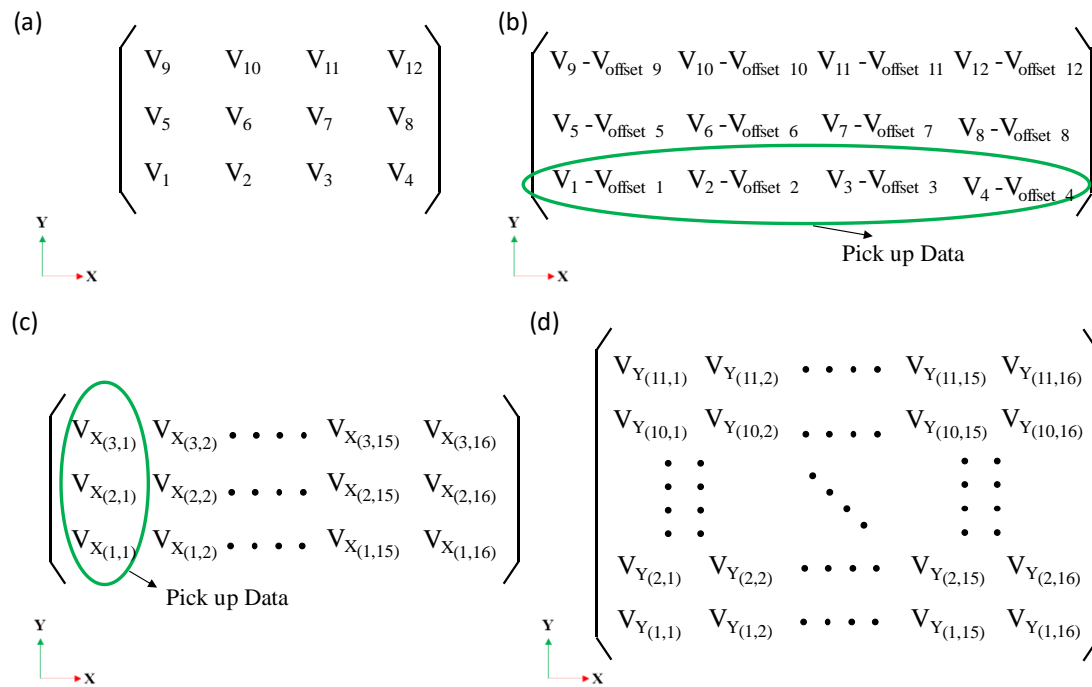

**Figure S3.** The illustration of the method of curve fitting: (a) The measured voltage outputs of the electromagnets-array are arranged as a data-array. (b) The measured voltage outputs subtract the offset values; which are used to conduct the curve fitting for x-axis. (c) The predicted voltage outputs which are obtained from the fitting curve for x-axis are used to conduct curve fitting for y-axis. (d) The predicted voltage output obtained from the fitting curve of y-axis. Please see corresponding paragraphs for the detailed description of these figures (note: the orientation of the x-y coordinate in each figure and the electromagnets-array are the same).

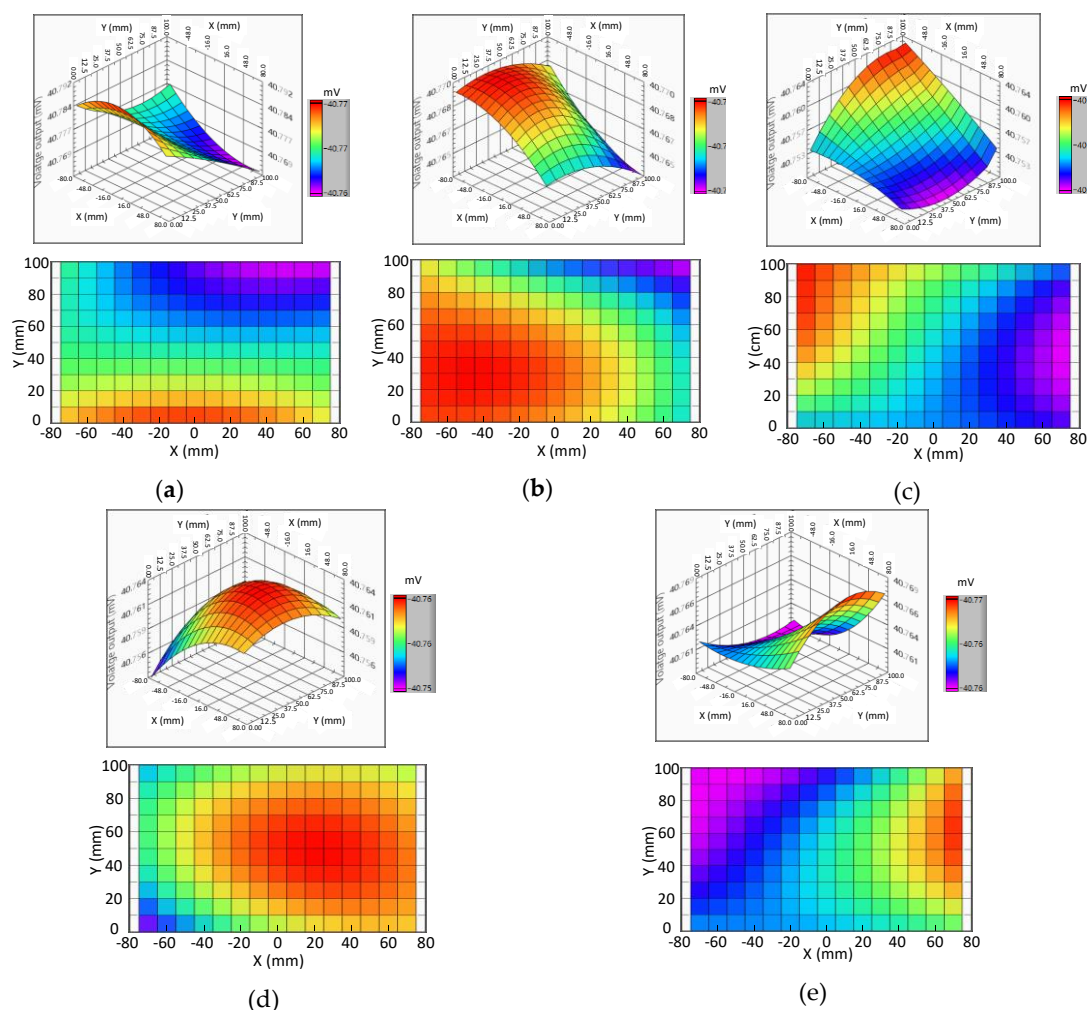

**Figure S4.** The results of curve fitting: the isometric view and top-plane view of curve-fitting-predicted voltage outputs of the receiving electromagnets when the collar moves to (a) location E, (b) location L1, (c) location L2, (d) location R1, and (e) location R2 in the bronchi-tree model.

Regarding the performing curve fitting for y-axis first (and x-axis later), we redo another experiment because the offset values used to calibrate the system were conducted in the signal process program and cannot be exported as a text file in previous experiments in our paper. Thus, the offset values are not available. Due to this, in the redo experiment, we export the offset values as a text file during the experiment. [As a note, below paragraph addresses the issue of offset values for calibration: If the results of predicted voltages are not calibrated by offset values, the results of curve fitting would not be able to indicate the location of collar by local maximum voltage output. Figure S5 shows the results of curve fitting with and without calibration at location E, L1, L2, R1, and R2. When the collar is at location E, the result of curve fitting with calibration has only one local maximum voltage output, as shown in upper figure of Figure S5a. Thus, the collar is able to be targeted. However, without calibration, the result has two local maximum voltage outputs, as shown in lower figure of Figure S5a. We are not able to determine which local maximum voltage output is induced by the collar. According to this result, the location of collar is not able to be targeted by the result without calibration. Furthermore, even though the collar is at different location, the results of curve fitting without calibration are almost the same. Due to this, in our signal-processing program, we need the offset values to conduct the curve fitting, otherwise the slight difference between each electromagnet will influence the result of curve fitting]. Due to these, we redo the experiment to record both of raw data (measured voltage outputs) and offset values to conduct two regression



analyses (i.e., curve fitting from x-axis to y-axis and from y-axis to x-axis). In the re-do experiment, we test out system when the collar is at 5 locations and conduct two regression analyses [the coordinate points of 5 locations 1, 2, 3, 4, and 5 are (0, 5), (−45, 30), (−60, 65), (35, 55) and (55, 85), respectively. To conduct two curve fittings, we modify and develop the signal-processing program (developed by using Labview 2019). The block diagrams of the two curve fittings in Labview software are shown in Figure S6].

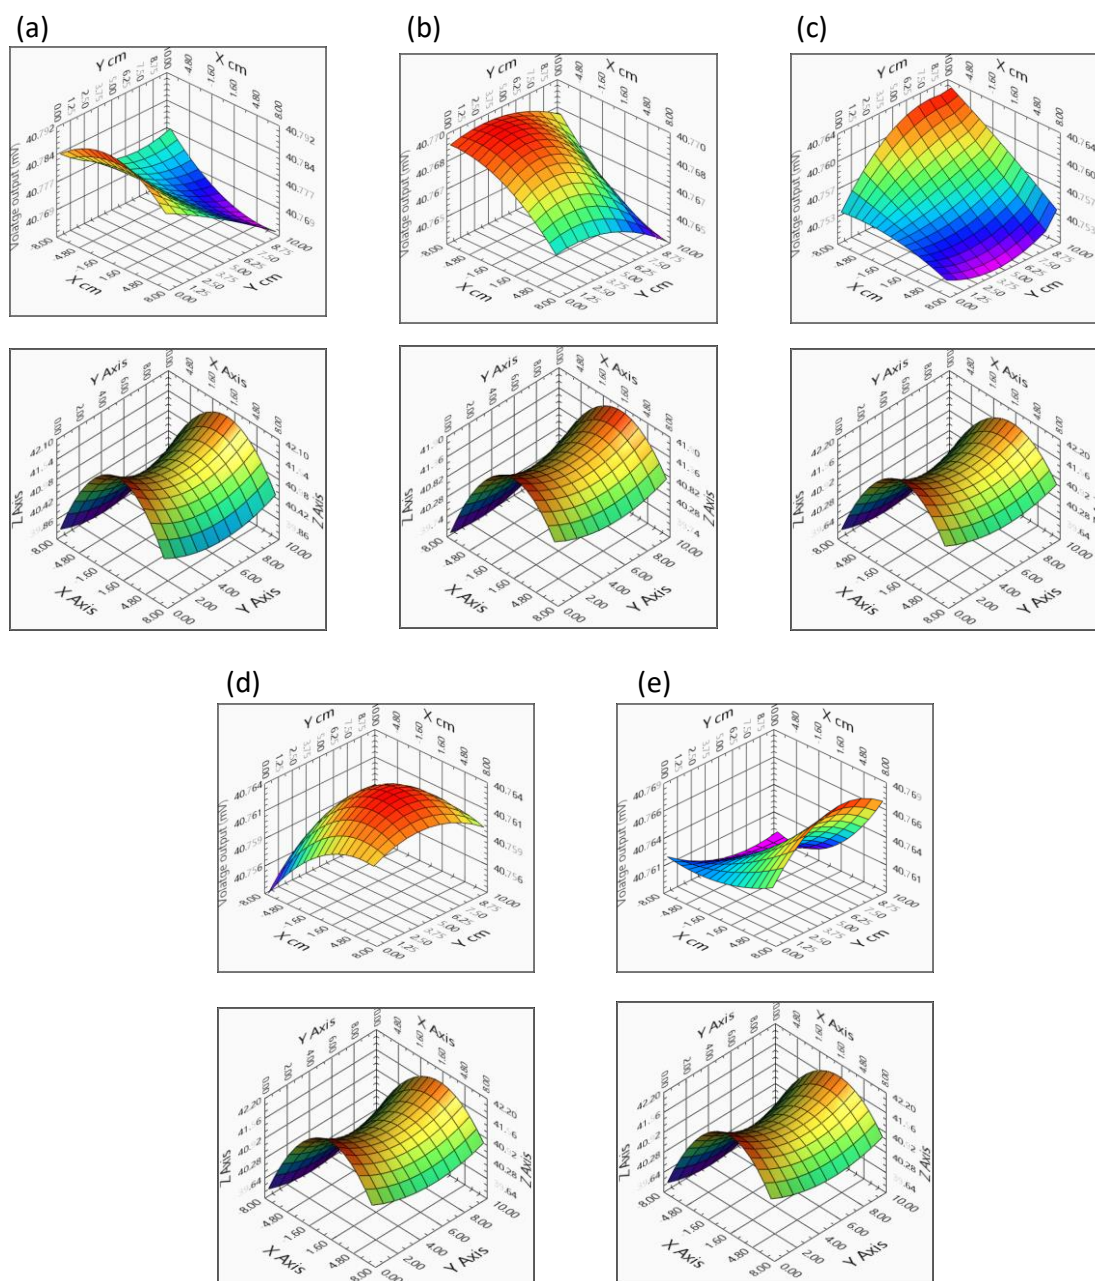

**Figure S5.** The result of predicted voltage output at different location with calibration (upper figure) and without calibration (lower figure): (a) location E, (b) location L1, (c) location L2, (d) location R1, and (e) location R2.

(a)

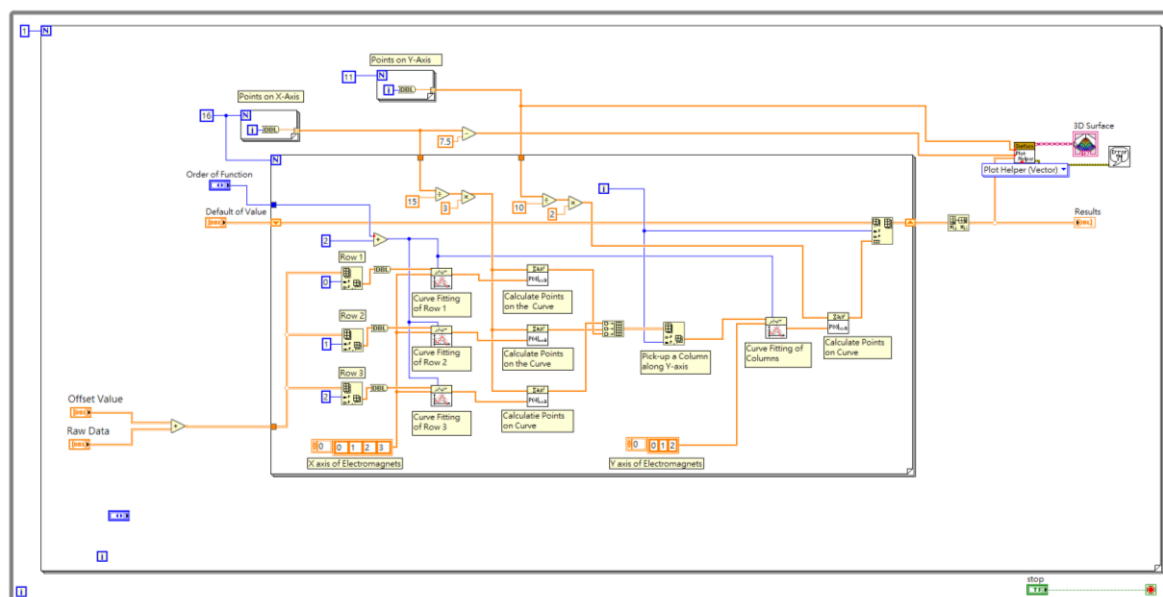

(b)

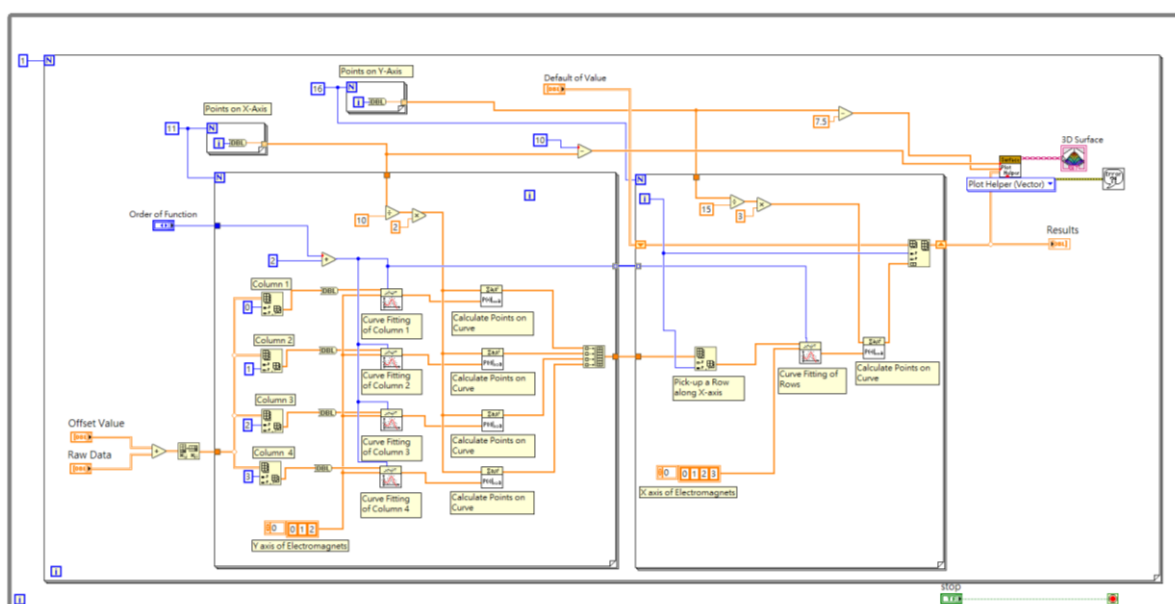

**Figure S6.** The block diagrams of the curve fitting which starts: (a) from x-axis to y-axis and (b) from y-axis to x-axis.

After we modify the signal-processing program, we test the system and analyze the output signals by using above two curve-fitting programs. Figure S7 shows the raw data (measured voltage outputs) and offset values at each location. After we obtain the raw data and the offset value, we import them to the signal-processing program to conduct the curve fitting. The results of two curve fittings are shown from Figure S8 to Figure S17. In these figures, the values which are highlighted by red color are the maximum predicted voltage output. According to results, when the collar is at location 1, 2, 3, 4 and 5, the predicted location obtained by curve fitting from x-axis to y-axis are (20, 0), (−75, 30), (−75, 80), (75, 65) and (75, 100), respectively. The predicted location obtained by curve fitting from y-axis to x-axis is (20, 0), (−75, 30), (−75, 80), (75, 65) and (75, 100), respectively (Note: If the largest estimated values of voltage outputs on two neighboring points are the same, we choose the central point between the two points as the point having local largest estimated value). According

to the results, the predicted locations of the collar are the same when using curve-fitting starting from x-axis to y-axis or from y-axis to x-axis. Due to this, consequently, the predicted voltage outputs are also the same. That is, the predicted locations and predicted voltage outputs are the same when using curve-fitting starting from x-axis to y-axis or from y-axis to x-axis. According to the results, the averaged x-axis and y-axis targeting errors of curve fitting starting from x-axis to y-axis are 25 mm and 9 mm, respectively. The averaged x-axis and y-axis targeting errors of curve fitting starting from y-axis to x-axis are also 25 mm and 9 mm, respectively. Furthermore, as we mentioned, our system has sufficient accuracy to navigate the bronchoscope even though the averaged targeting error is up to 25 mm. Because the results obtained by both curve fittings (starting from x-axis to y-axis and from y-axis to x-axis) are the same, both curve fitting are applicable and thus we finally choose the original curve fitting (i.e., the one starting from x-axis to y-axis) for our manuscript. Note: we also add the results of the curve fitting starting from y-axis to x-axis as contrast references in the supplementary material. In the future, according to above results, we will continuously improve our signal processing method to increase accuracy for patients' benefits.

(a)

Location 1

Measured Voltage output

Y-Axis (mm)

100

53.2854

57.1865

56.9069

53.9314

50

54.0283

56.6285

56.5122

53.1925

0

53.0909

57.6942

56.4893

52.3045

75

-25

25

75

X-Axis (mm)

Offset Value

1.8282

-2.07698

-1.77041

1.18385

1.07123

-1.52641

-1.41403

1.90291

2.00469

-2.58974

-1.39532

2.79202

(b)

Location 2

Measured Voltage output

Y-Axis (mm)

100

53.2904

57.1892

56.8386

53.7998

50

54.026

56.6556

56.5332

53.1995

0

53.0949

57.5312

56.513

52.307

75

-25

25

75

X-Axis (mm)

Offset Value

1.79606

-2.10505

-1.76153

1.28051

1.06171

-1.56884

-1.45177

1.8775

1.98602

-2.44995

-1.43268

2.76802

(c)

Location 3

Measured Voltage output

Y-Axis (mm)

100

53.2899

57.1847

56.8509

53.8166

50

54.034

56.6525

56.5269

53.199

0

53.1078

57.5624

56.5109

52.3088

75

-25

25

75

X-Axis (mm)

Offset Value

1.79972

-2.10038

-1.76713

1.26124

1.0634

-1.56117

-1.44374

1.88323

1.99097

-2.47435

-1.4256

2.7738

(d)

Location 4

Measured Voltage output

Y-Axis (mm)

100

53.2795

57.1768

56.8625

53.8348

50

54.0247

56.647

56.5381

53.2125

0

53.1021

57.5807

56.5229

52.3227

75

-25

25

75

X-Axis (mm)

Offset Value

1.80335

-2.08994

-1.76918

1.25192

1.06424

-1.55474

-1.43847

1.88589

1.98688

-2.48797

-1.42479

2.77282

(e)

Location 5

Measured Voltage output

Y-Axis (mm)

100

53.285

57.1757

56.8883

53.8726

50

54.0261

56.6391

56.5293

53.2121

0

53.1002

57.6264

56.5214

52.3327

75

-25

25

75

X-Axis (mm)

Offset Value

1.81107

-2.08094

-1.79345

1.22697

1.069

-1.54272

-1.42524

1.89717

1.99607

-2.53056

-1.40994

2.78355

Layout of Receiving Electromagnets

No. 9

No. 10

No. 11

No. 12

No. 5

No. 6

No. 7

No. 8

No. 1

No. 2

No. 3

No. 4



**Figure S7.** The measured voltage output and offset values of receiving electromagnets when the collar is at different locations: (a) location 1, (b) location 2, (c) location 3, (d) location 4 and (e) location 5.

Unit: mV

|     |         |         |         |         |         |         |         |         |         |         |         |         |         |         |         |         |
|-----|---------|---------|---------|---------|---------|---------|---------|---------|---------|---------|---------|---------|---------|---------|---------|---------|
| 100 | 55.0972 | 55.0979 | 55.0985 | 55.099  | 55.0994 | 55.0996 | 55.0997 | 55.0997 | 55.0995 | 55.0992 | 55.0988 | 55.0983 | 55.0976 | 55.0969 | 55.0959 | 55.0949 |
| 90  | 55.0972 | 55.0976 | 55.098  | 55.0982 | 55.0983 | 55.0983 | 55.0983 | 55.0981 | 55.0978 | 55.0974 | 55.0969 | 55.0964 | 55.0957 | 55.0949 | 55.094  | 55.093  |
| 80  | 55.0974 | 55.0977 | 55.0979 | 55.0979 | 55.0979 | 55.0978 | 55.0977 | 55.0974 | 55.097  | 55.0966 | 55.0961 | 55.0954 | 55.0947 | 55.0939 | 55.093  | 55.0921 |
| 70  | 55.098  | 55.0982 | 55.0983 | 55.0983 | 55.0983 | 55.0981 | 55.0979 | 55.0976 | 55.0972 | 55.0967 | 55.0961 | 55.0955 | 55.0948 | 55.094  | 55.0931 | 55.0921 |
| 60  | 55.0988 | 55.0991 | 55.0992 | 55.0993 | 55.0993 | 55.0991 | 55.0989 | 55.0987 | 55.0983 | 55.0978 | 55.0972 | 55.0966 | 55.0958 | 55.095  | 55.0941 | 55.0931 |
| 50  | 55.0999 | 55.1003 | 55.1006 | 55.1009 | 55.101  | 55.1009 | 55.1008 | 55.1006 | 55.1003 | 55.0999 | 55.0993 | 55.0987 | 55.0979 | 55.0971 | 55.0961 | 55.095  |
| 40  | 55.1013 | 55.102  | 55.1026 | 55.103  | 55.1033 | 55.1035 | 55.1035 | 55.1035 | 55.1032 | 55.1029 | 55.1024 | 55.1018 | 55.101  | 55.1001 | 55.0991 | 55.0979 |
| 30  | 55.103  | 55.1041 | 55.105  | 55.1058 | 55.1064 | 55.1068 | 55.1071 | 55.1072 | 55.1071 | 55.1069 | 55.1065 | 55.1059 | 55.1051 | 55.1042 | 55.1031 | 55.1018 |
| 20  | 55.1049 | 55.1065 | 55.108  | 55.1092 | 55.1102 | 55.1109 | 55.1115 | 55.1118 | 55.1119 | 55.1118 | 55.1115 | 55.111  | 55.1102 | 55.1092 | 55.1081 | 55.1067 |
| 10  | 55.1071 | 55.1094 | 55.1114 | 55.1131 | 55.1146 | 55.1158 | 55.1167 | 55.1173 | 55.1177 | 55.1178 | 55.1176 | 55.1171 | 55.1163 | 55.1153 | 55.114  | 55.1125 |
| 0   | 55.1096 | 55.1127 | 55.1154 | 55.1177 | 55.1197 | 55.1214 | 55.1227 | 55.1237 | 55.1244 | 55.1246 | 55.1246 | 55.1242 | 55.1235 | 55.1224 | 55.121  | 55.1192 |
|     | -75     | -65     | -55     | -45     | -35     | -25     | -15     | -5      | 5       | 15      | 25      | 35      | 45      | 55      | 65      | 75      |

X-Axis (mm)

**Figure S8.** The result of the curve fitting from x-axis to y-axis when the collar at location 1. From the results, the predicted location is at (20, 0). (Note: due to the values at (15, 0) and (25, 0) are the same, we chose the center of these two points as the predicted location).

Unit: mV

|     |         |         |         |         |         |         |         |         |         |         |         |         |         |         |         |         |
|-----|---------|---------|---------|---------|---------|---------|---------|---------|---------|---------|---------|---------|---------|---------|---------|---------|
| 100 | 55.0972 | 55.0979 | 55.0985 | 55.099  | 55.0994 | 55.0996 | 55.0997 | 55.0997 | 55.0995 | 55.0992 | 55.0988 | 55.0983 | 55.0976 | 55.0969 | 55.0959 | 55.0949 |
| 90  | 55.0972 | 55.0976 | 55.098  | 55.0982 | 55.0983 | 55.0983 | 55.0983 | 55.0981 | 55.0978 | 55.0974 | 55.0969 | 55.0964 | 55.0957 | 55.0949 | 55.094  | 55.093  |
| 80  | 55.0974 | 55.0977 | 55.0979 | 55.0979 | 55.0979 | 55.0978 | 55.0977 | 55.0974 | 55.097  | 55.0966 | 55.0961 | 55.0954 | 55.0947 | 55.0939 | 55.093  | 55.0921 |
| 70  | 55.098  | 55.0982 | 55.0983 | 55.0983 | 55.0983 | 55.0981 | 55.0979 | 55.0976 | 55.0972 | 55.0967 | 55.0961 | 55.0955 | 55.0948 | 55.094  | 55.0931 | 55.0921 |
| 60  | 55.0988 | 55.0991 | 55.0992 | 55.0993 | 55.0993 | 55.0991 | 55.0989 | 55.0987 | 55.0983 | 55.0978 | 55.0972 | 55.0966 | 55.0958 | 55.095  | 55.0941 | 55.0931 |
| 50  | 55.0999 | 55.1003 | 55.1006 | 55.1009 | 55.101  | 55.1009 | 55.1008 | 55.1006 | 55.1003 | 55.0999 | 55.0993 | 55.0987 | 55.0979 | 55.0971 | 55.0961 | 55.095  |
| 40  | 55.1013 | 55.102  | 55.1026 | 55.103  | 55.1033 | 55.1035 | 55.1035 | 55.1035 | 55.1032 | 55.1029 | 55.1024 | 55.1018 | 55.101  | 55.1001 | 55.0991 | 55.0979 |
| 30  | 55.103  | 55.1041 | 55.105  | 55.1058 | 55.1064 | 55.1068 | 55.1071 | 55.1072 | 55.1071 | 55.1069 | 55.1065 | 55.1059 | 55.1051 | 55.1042 | 55.1031 | 55.1018 |
| 20  | 55.1049 | 55.1065 | 55.108  | 55.1092 | 55.1102 | 55.1109 | 55.1115 | 55.1118 | 55.1119 | 55.1118 | 55.1115 | 55.111  | 55.1102 | 55.1092 | 55.1081 | 55.1067 |
| 10  | 55.1071 | 55.1094 | 55.1114 | 55.1131 | 55.1146 | 55.1158 | 55.1167 | 55.1173 | 55.1177 | 55.1178 | 55.1176 | 55.1171 | 55.1163 | 55.1153 | 55.114  | 55.1125 |
| 0   | 55.1096 | 55.1127 | 55.1154 | 55.1177 | 55.1197 | 55.1214 | 55.1227 | 55.1237 | 55.1244 | 55.1246 | 55.1246 | 55.1242 | 55.1235 | 55.1224 | 55.121  | 55.1192 |
|     | -75     | -65     | -55     | -45     | -35     | -25     | -15     | -5      | 5       | 15      | 25      | 35      | 45      | 55      | 65      | 75      |

X-Axis (mm)

**Figure S9.** The result of the curve fitting from y-axis to x-axis when the collar at location 1. From the results, the predicted location is at (20, 0). (Note: due to the values at (15, 0) and (25, 0) are the same, we chose the center of these two points as the predicted location).

Unit: mV

|     |         |         |         |         |         |         |         |         |         |         |         |         |         |         |         |         |
|-----|---------|---------|---------|---------|---------|---------|---------|---------|---------|---------|---------|---------|---------|---------|---------|---------|
| 100 | 55.0808 | 55.0812 | 55.0815 | 55.0817 | 55.0818 | 55.0817 | 55.0816 | 55.0813 | 55.0809 | 55.0805 | 55.0799 | 55.0791 | 55.0783 | 55.0774 | 55.0763 | 55.0752 |
| 90  | 55.0828 | 55.0832 | 55.0833 | 55.0834 | 55.0834 | 55.0832 | 55.083  | 55.0826 | 55.0821 | 55.0815 | 55.0807 | 55.0799 | 55.0789 | 55.0779 | 55.0767 | 55.0754 |
| 80  | 55.0846 | 55.0848 | 55.0849 | 55.0848 | 55.0847 | 55.0844 | 55.084  | 55.0836 | 55.083  | 55.0823 | 55.0814 | 55.0805 | 55.0795 | 55.0783 | 55.077  | 55.0756 |
| 70  | 55.086  | 55.0861 | 55.086  | 55.0859 | 55.0856 | 55.0853 | 55.0848 | 55.0842 | 55.0836 | 55.0828 | 55.0819 | 55.0809 | 55.0798 | 55.0786 | 55.0774 | 55.076  |
| 60  | 55.0872 | 55.0871 | 55.0869 | 55.0866 | 55.0862 | 55.0858 | 55.0852 | 55.0846 | 55.0839 | 55.0831 | 55.0822 | 55.0812 | 55.0801 | 55.0789 | 55.0777 | 55.0763 |
| 50  | 55.088  | 55.0877 | 55.0874 | 55.087  | 55.0865 | 55.086  | 55.0854 | 55.0847 | 55.0839 | 55.0831 | 55.0822 | 55.0813 | 55.0802 | 55.0791 | 55.078  | 55.0767 |
| 40  | 55.0885 | 55.088  | 55.0875 | 55.087  | 55.0864 | 55.0858 | 55.0852 | 55.0845 | 55.0837 | 55.0829 | 55.0821 | 55.0812 | 55.0803 | 55.0793 | 55.0783 | 55.0772 |
| 30  | 55.0886 | 55.088  | 55.0874 | 55.0867 | 55.086  | 55.0853 | 55.0846 | 55.0839 | 55.0832 | 55.0825 | 55.0817 | 55.0809 | 55.0801 | 55.0793 | 55.0785 | 55.0777 |
| 20  | 55.0885 | 55.0876 | 55.0868 | 55.086  | 55.0853 | 55.0845 | 55.0838 | 55.0831 | 55.0824 | 55.0818 | 55.0811 | 55.0805 | 55.0799 | 55.0793 | 55.0788 | 55.0783 |
| 10  | 55.088  | 55.0869 | 55.086  | 55.085  | 55.0842 | 55.0834 | 55.0826 | 55.082  | 55.0814 | 55.0808 | 55.0803 | 55.0799 | 55.0796 | 55.0793 | 55.0791 | 55.0789 |
| 0   | 55.0872 | 55.0859 | 55.0848 | 55.0837 | 55.0827 | 55.0819 | 55.0812 | 55.0805 | 55.08   | 55.0796 | 55.0793 | 55.0792 | 55.0791 | 55.0791 | 55.0793 | 55.0796 |
|     | -75     | -65     | -55     | -45     | -35     | -25     | -15     | -5      | 5       | 15      | 25      | 35      | 45      | 55      | 65      | 75      |

Y-Axis (mm)

X-Axis (mm)

**Figure S10.** The result of the curve fitting from x-axis to y-axis when the collar at location 2. From the results, the predicted location is at (−75, 30).

Unit: mV

|     |         |         |         |         |         |         |         |         |         |         |         |         |         |         |         |         |
|-----|---------|---------|---------|---------|---------|---------|---------|---------|---------|---------|---------|---------|---------|---------|---------|---------|
| 100 | 55.0808 | 55.0812 | 55.0815 | 55.0817 | 55.0818 | 55.0817 | 55.0816 | 55.0813 | 55.0809 | 55.0805 | 55.0799 | 55.0791 | 55.0783 | 55.0774 | 55.0763 | 55.0752 |
| 90  | 55.0828 | 55.0832 | 55.0833 | 55.0834 | 55.0834 | 55.0832 | 55.083  | 55.0826 | 55.0821 | 55.0815 | 55.0807 | 55.0799 | 55.0789 | 55.0779 | 55.0767 | 55.0754 |
| 80  | 55.0846 | 55.0848 | 55.0849 | 55.0848 | 55.0847 | 55.0844 | 55.084  | 55.0836 | 55.083  | 55.0823 | 55.0814 | 55.0805 | 55.0795 | 55.0783 | 55.077  | 55.0756 |
| 70  | 55.086  | 55.0861 | 55.086  | 55.0859 | 55.0856 | 55.0853 | 55.0848 | 55.0842 | 55.0836 | 55.0828 | 55.0819 | 55.0809 | 55.0798 | 55.0786 | 55.0774 | 55.076  |
| 60  | 55.0872 | 55.0871 | 55.0869 | 55.0866 | 55.0862 | 55.0858 | 55.0852 | 55.0846 | 55.0839 | 55.0831 | 55.0822 | 55.0812 | 55.0801 | 55.0789 | 55.0777 | 55.0763 |
| 50  | 55.088  | 55.0877 | 55.0874 | 55.087  | 55.0865 | 55.086  | 55.0854 | 55.0847 | 55.0839 | 55.0831 | 55.0822 | 55.0813 | 55.0802 | 55.0791 | 55.078  | 55.0767 |
| 40  | 55.0885 | 55.088  | 55.0875 | 55.087  | 55.0864 | 55.0858 | 55.0852 | 55.0845 | 55.0837 | 55.0829 | 55.0821 | 55.0812 | 55.0803 | 55.0793 | 55.0783 | 55.0772 |
| 30  | 55.0886 | 55.088  | 55.0874 | 55.0867 | 55.086  | 55.0853 | 55.0846 | 55.0839 | 55.0832 | 55.0825 | 55.0817 | 55.0809 | 55.0801 | 55.0793 | 55.0785 | 55.0777 |
| 20  | 55.0885 | 55.0876 | 55.0868 | 55.086  | 55.0853 | 55.0845 | 55.0838 | 55.0831 | 55.0824 | 55.0818 | 55.0811 | 55.0805 | 55.0799 | 55.0793 | 55.0788 | 55.0783 |
| 10  | 55.088  | 55.0869 | 55.086  | 55.085  | 55.0842 | 55.0834 | 55.0826 | 55.082  | 55.0814 | 55.0808 | 55.0803 | 55.0799 | 55.0796 | 55.0793 | 55.0791 | 55.0789 |
| 0   | 55.0872 | 55.0859 | 55.0848 | 55.0837 | 55.0827 | 55.0819 | 55.0812 | 55.0805 | 55.08   | 55.0796 | 55.0793 | 55.0792 | 55.0791 | 55.0791 | 55.0793 | 55.0796 |
|     | -75     | -65     | -55     | -45     | -35     | -25     | -15     | -5      | 5       | 15      | 25      | 35      | 45      | 55      | 65      | 75      |

Y-Axis (mm)

X-Axis (mm)

**Figure S11.** The result of the curve fitting from y-axis to x-axis when the collar at location 2. From the results, the predicted location is at (−75, 30).

Unit: mV

|     |         |         |         |         |         |         |         |         |         |         |         |         |         |         |         |         |
|-----|---------|---------|---------|---------|---------|---------|---------|---------|---------|---------|---------|---------|---------|---------|---------|---------|
| 100 | 55.0984 | 55.0962 | 55.0942 | 55.0924 | 55.0907 | 55.0892 | 55.0879 | 55.0867 | 55.0857 | 55.0848 | 55.0841 | 55.0836 | 55.0832 | 55.083  | 55.0829 | 55.083  |
| 90  | 55.0989 | 55.0968 | 55.0948 | 55.093  | 55.0913 | 55.0898 | 55.0884 | 55.0872 | 55.0861 | 55.0852 | 55.0844 | 55.0838 | 55.0834 | 55.0831 | 55.0829 | 55.0829 |
| 80  | 55.0992 | 55.0971 | 55.0951 | 55.0933 | 55.0916 | 55.0901 | 55.0887 | 55.0875 | 55.0864 | 55.0854 | 55.0846 | 55.084  | 55.0834 | 55.0831 | 55.0828 | 55.0828 |
| 70  | 55.0991 | 55.097  | 55.0951 | 55.0934 | 55.0917 | 55.0902 | 55.0889 | 55.0876 | 55.0865 | 55.0855 | 55.0847 | 55.084  | 55.0834 | 55.083  | 55.0827 | 55.0825 |
| 60  | 55.0986 | 55.0967 | 55.0949 | 55.0932 | 55.0916 | 55.0902 | 55.0888 | 55.0876 | 55.0865 | 55.0856 | 55.0847 | 55.084  | 55.0833 | 55.0828 | 55.0824 | 55.0822 |
| 50  | 55.0979 | 55.0961 | 55.0944 | 55.0928 | 55.0913 | 55.0899 | 55.0886 | 55.0875 | 55.0864 | 55.0854 | 55.0846 | 55.0838 | 55.0831 | 55.0826 | 55.0821 | 55.0818 |
| 40  | 55.0968 | 55.0952 | 55.0936 | 55.0922 | 55.0908 | 55.0895 | 55.0883 | 55.0872 | 55.0861 | 55.0852 | 55.0843 | 55.0835 | 55.0828 | 55.0822 | 55.0817 | 55.0813 |
| 30  | 55.0954 | 55.0939 | 55.0926 | 55.0913 | 55.09   | 55.0889 | 55.0878 | 55.0867 | 55.0857 | 55.0848 | 55.084  | 55.0832 | 55.0825 | 55.0818 | 55.0812 | 55.0807 |
| 20  | 55.0936 | 55.0924 | 55.0913 | 55.0901 | 55.0891 | 55.088  | 55.0871 | 55.0861 | 55.0852 | 55.0843 | 55.0835 | 55.0827 | 55.082  | 55.0813 | 55.0806 | 55.08   |
| 10  | 55.0915 | 55.0906 | 55.0897 | 55.0888 | 55.0879 | 55.087  | 55.0862 | 55.0854 | 55.0845 | 55.0837 | 55.0829 | 55.0822 | 55.0814 | 55.0807 | 55.0799 | 55.0792 |
| 0   | 55.0891 | 55.0885 | 55.0878 | 55.0872 | 55.0865 | 55.0858 | 55.0851 | 55.0844 | 55.0837 | 55.083  | 55.0823 | 55.0815 | 55.0807 | 55.0799 | 55.0792 | 55.0783 |
|     | -75     | -65     | -55     | -45     | -35     | -25     | -15     | -5      | 5       | 15      | 25      | 35      | 45      | 55      | 65      | 75      |

X-Axis (mm)

**Figure S12.** The result of the curve fitting from x-axis to y-axis when the collar at location 3. From the results, the predicted location is at (−75, 80).

Unit: mV

|     |         |         |         |         |         |         |         |         |         |         |         |         |         |         |         |         |
|-----|---------|---------|---------|---------|---------|---------|---------|---------|---------|---------|---------|---------|---------|---------|---------|---------|
| 100 | 55.0984 | 55.0962 | 55.0942 | 55.0924 | 55.0907 | 55.0892 | 55.0879 | 55.0867 | 55.0857 | 55.0848 | 55.0841 | 55.0836 | 55.0832 | 55.083  | 55.0829 | 55.083  |
| 90  | 55.0989 | 55.0968 | 55.0948 | 55.093  | 55.0913 | 55.0898 | 55.0884 | 55.0872 | 55.0861 | 55.0852 | 55.0844 | 55.0838 | 55.0834 | 55.0831 | 55.0829 | 55.0829 |
| 80  | 55.0992 | 55.0971 | 55.0951 | 55.0933 | 55.0916 | 55.0901 | 55.0887 | 55.0875 | 55.0864 | 55.0854 | 55.0846 | 55.084  | 55.0834 | 55.0831 | 55.0828 | 55.0828 |
| 70  | 55.0991 | 55.097  | 55.0951 | 55.0934 | 55.0917 | 55.0902 | 55.0889 | 55.0876 | 55.0865 | 55.0855 | 55.0847 | 55.084  | 55.0834 | 55.083  | 55.0827 | 55.0825 |
| 60  | 55.0986 | 55.0967 | 55.0949 | 55.0932 | 55.0916 | 55.0902 | 55.0888 | 55.0876 | 55.0865 | 55.0856 | 55.0847 | 55.084  | 55.0833 | 55.0828 | 55.0824 | 55.0822 |
| 50  | 55.0979 | 55.0961 | 55.0944 | 55.0928 | 55.0913 | 55.0899 | 55.0886 | 55.0875 | 55.0864 | 55.0854 | 55.0846 | 55.0838 | 55.0831 | 55.0826 | 55.0821 | 55.0818 |
| 40  | 55.0968 | 55.0952 | 55.0936 | 55.0922 | 55.0908 | 55.0895 | 55.0883 | 55.0872 | 55.0861 | 55.0852 | 55.0843 | 55.0835 | 55.0828 | 55.0822 | 55.0817 | 55.0813 |
| 30  | 55.0954 | 55.0939 | 55.0926 | 55.0913 | 55.09   | 55.0889 | 55.0878 | 55.0867 | 55.0857 | 55.0848 | 55.084  | 55.0832 | 55.0825 | 55.0818 | 55.0812 | 55.0807 |
| 20  | 55.0936 | 55.0924 | 55.0913 | 55.0901 | 55.0891 | 55.088  | 55.0871 | 55.0861 | 55.0852 | 55.0843 | 55.0835 | 55.0827 | 55.082  | 55.0813 | 55.0806 | 55.08   |
| 10  | 55.0915 | 55.0906 | 55.0897 | 55.0888 | 55.0879 | 55.087  | 55.0862 | 55.0854 | 55.0845 | 55.0837 | 55.0829 | 55.0822 | 55.0814 | 55.0807 | 55.0799 | 55.0792 |
| 0   | 55.0891 | 55.0885 | 55.0878 | 55.0872 | 55.0865 | 55.0858 | 55.0851 | 55.0844 | 55.0837 | 55.083  | 55.0823 | 55.0815 | 55.0807 | 55.0799 | 55.0792 | 55.0783 |
|     | -75     | -65     | -55     | -45     | -35     | -25     | -15     | -5      | 5       | 15      | 25      | 35      | 45      | 55      | 65      | 75      |

X-Axis (mm)

**Figure S13.** The result of the curve fitting from y-axis to x-axis when the collar at location 3. From the results, the predicted location is at (−75, 80).

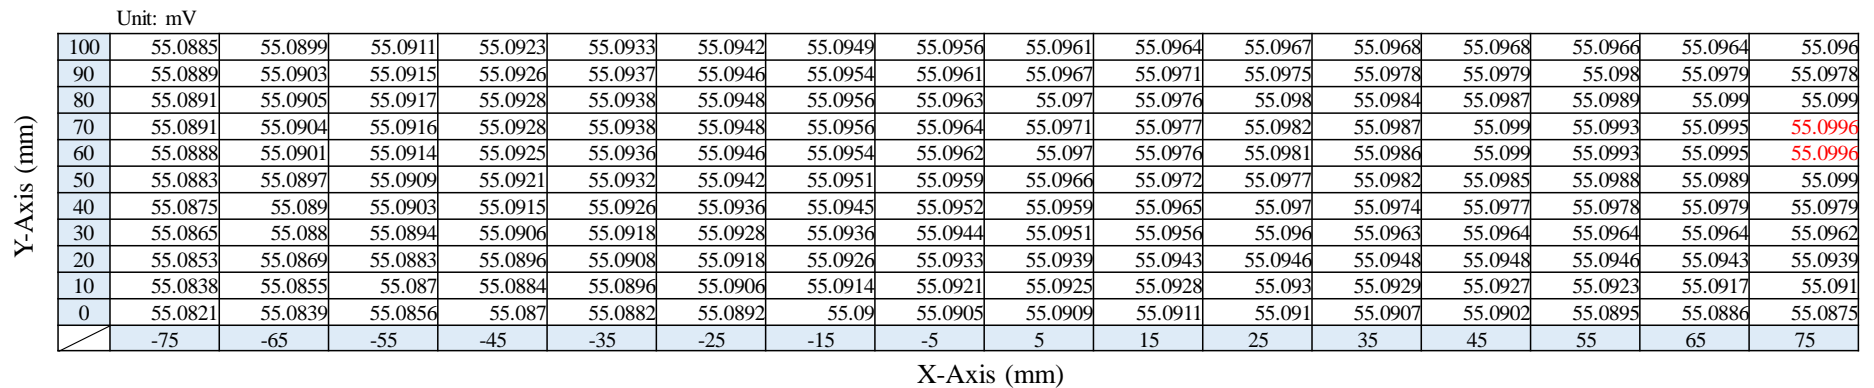

**Figure S14.** The result of the curve fitting from x-axis to y-axis when the collar at location 4. From the results, the predicted location is at (75, 65). (Note: due to the values at (75, 60) and (75, 70) are the same, we chose the center of these two points as the predicted location).

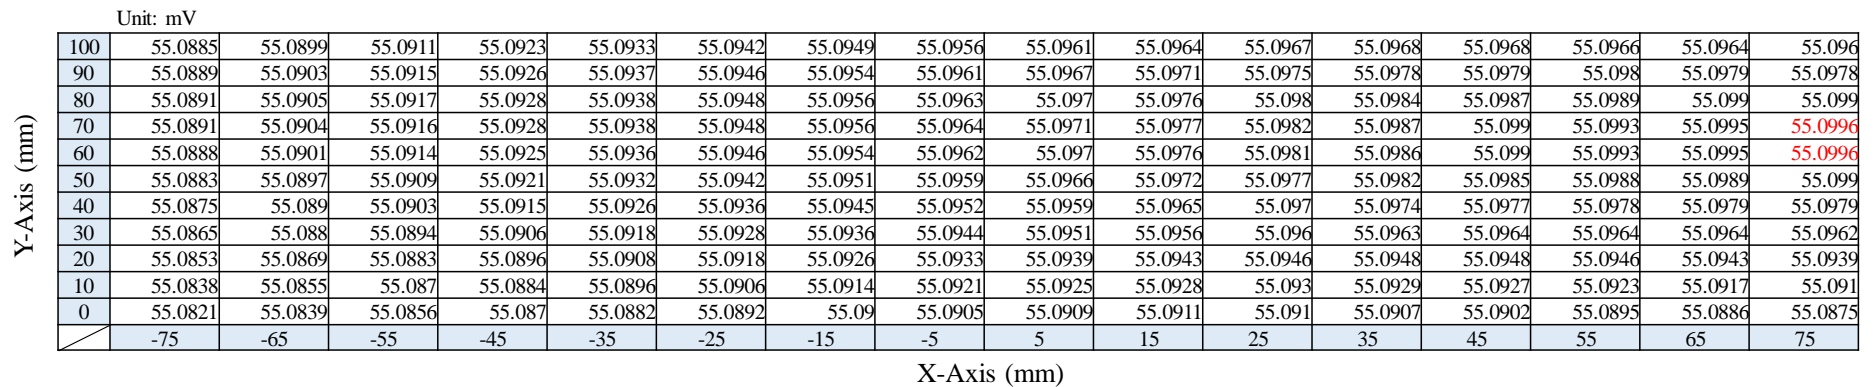

**Figure S15.** The result of the curve fitting from y-axis to x-axis when the collar at location 4. From the results, the predicted location is at (75, 65). (Note: due to the values at (75, 60) and (75, 70) are the same, we chose the center of these two points as the predicted location).



Unit: mV

|     |         |         |         |         |         |         |         |         |         |         |         |         |         |         |         |         |
|-----|---------|---------|---------|---------|---------|---------|---------|---------|---------|---------|---------|---------|---------|---------|---------|---------|
| 100 | 55.0949 | 55.0957 | 55.0966 | 55.0976 | 55.0987 | 55.0999 | 55.1012 | 55.1026 | 55.1041 | 55.1057 | 55.1074 | 55.1093 | 55.1112 | 55.1132 | 55.1154 | 55.1176 |
| 90  | 55.0947 | 55.0955 | 55.0964 | 55.0973 | 55.0984 | 55.0995 | 55.1008 | 55.1021 | 55.1036 | 55.1051 | 55.1067 | 55.1084 | 55.1102 | 55.1121 | 55.1141 | 55.1162 |
| 80  | 55.0946 | 55.0953 | 55.0962 | 55.0971 | 55.0981 | 55.0992 | 55.1003 | 55.1016 | 55.1029 | 55.1044 | 55.1059 | 55.1075 | 55.1092 | 55.1109 | 55.1128 | 55.1147 |
| 70  | 55.0945 | 55.0952 | 55.096  | 55.0968 | 55.0977 | 55.0987 | 55.0998 | 55.101  | 55.1022 | 55.1035 | 55.1049 | 55.1064 | 55.108  | 55.1096 | 55.1114 | 55.1132 |
| 60  | 55.0946 | 55.0951 | 55.0958 | 55.0965 | 55.0974 | 55.0982 | 55.0992 | 55.1003 | 55.1014 | 55.1026 | 55.1039 | 55.1052 | 55.1067 | 55.1082 | 55.1098 | 55.1115 |
| 50  | 55.0947 | 55.0951 | 55.0956 | 55.0963 | 55.0969 | 55.0977 | 55.0986 | 55.0995 | 55.1005 | 55.1016 | 55.1027 | 55.104  | 55.1053 | 55.1067 | 55.1082 | 55.1097 |
| 40  | 55.0948 | 55.0951 | 55.0955 | 55.096  | 55.0965 | 55.0971 | 55.0978 | 55.0986 | 55.0995 | 55.1004 | 55.1015 | 55.1026 | 55.1038 | 55.105  | 55.1064 | 55.1078 |
| 30  | 55.0951 | 55.0952 | 55.0954 | 55.0957 | 55.096  | 55.0965 | 55.097  | 55.0977 | 55.0984 | 55.0992 | 55.1001 | 55.1011 | 55.1021 | 55.1033 | 55.1046 | 55.1059 |
| 20  | 55.0954 | 55.0953 | 55.0953 | 55.0953 | 55.0955 | 55.0958 | 55.0962 | 55.0966 | 55.0972 | 55.0979 | 55.0986 | 55.0995 | 55.1004 | 55.1015 | 55.1026 | 55.1038 |
| 10  | 55.0958 | 55.0954 | 55.0952 | 55.095  | 55.095  | 55.0951 | 55.0952 | 55.0955 | 55.0959 | 55.0964 | 55.097  | 55.0977 | 55.0986 | 55.0995 | 55.1005 | 55.1017 |
| 0   | 55.0962 | 55.0956 | 55.0951 | 55.0947 | 55.0944 | 55.0943 | 55.0942 | 55.0943 | 55.0945 | 55.0949 | 55.0953 | 55.0959 | 55.0966 | 55.0974 | 55.0984 | 55.0994 |
|     | -75     | -65     | -55     | -45     | -35     | -25     | -15     | -5      | 5       | 15      | 25      | 35      | 45      | 55      | 65      | 75      |

X-Axis (mm)

**Figure S16.** The result of the curve fitting from x-axis to y-axis when the collar at location 5. From the results, the predicted location is at (75, 100).

Unit: mV

|     |         |         |         |         |         |         |         |         |         |         |         |         |         |         |         |         |
|-----|---------|---------|---------|---------|---------|---------|---------|---------|---------|---------|---------|---------|---------|---------|---------|---------|
| 100 | 55.0949 | 55.0957 | 55.0966 | 55.0976 | 55.0987 | 55.0999 | 55.1012 | 55.1026 | 55.1041 | 55.1057 | 55.1074 | 55.1093 | 55.1112 | 55.1132 | 55.1154 | 55.1176 |
| 90  | 55.0947 | 55.0955 | 55.0964 | 55.0973 | 55.0984 | 55.0995 | 55.1008 | 55.1021 | 55.1036 | 55.1051 | 55.1067 | 55.1084 | 55.1102 | 55.1121 | 55.1141 | 55.1162 |
| 80  | 55.0946 | 55.0953 | 55.0962 | 55.0971 | 55.0981 | 55.0992 | 55.1003 | 55.1016 | 55.1029 | 55.1044 | 55.1059 | 55.1075 | 55.1092 | 55.1109 | 55.1128 | 55.1147 |
| 70  | 55.0945 | 55.0952 | 55.096  | 55.0968 | 55.0977 | 55.0987 | 55.0998 | 55.101  | 55.1022 | 55.1035 | 55.1049 | 55.1064 | 55.108  | 55.1096 | 55.1114 | 55.1132 |
| 60  | 55.0946 | 55.0951 | 55.0958 | 55.0965 | 55.0974 | 55.0982 | 55.0992 | 55.1003 | 55.1014 | 55.1026 | 55.1039 | 55.1052 | 55.1067 | 55.1082 | 55.1098 | 55.1115 |
| 50  | 55.0947 | 55.0951 | 55.0956 | 55.0963 | 55.0969 | 55.0977 | 55.0986 | 55.0995 | 55.1005 | 55.1016 | 55.1027 | 55.104  | 55.1053 | 55.1067 | 55.1082 | 55.1097 |
| 40  | 55.0948 | 55.0951 | 55.0955 | 55.096  | 55.0965 | 55.0971 | 55.0978 | 55.0986 | 55.0995 | 55.1004 | 55.1015 | 55.1026 | 55.1038 | 55.105  | 55.1064 | 55.1078 |
| 30  | 55.0951 | 55.0952 | 55.0954 | 55.0957 | 55.096  | 55.0965 | 55.097  | 55.0977 | 55.0984 | 55.0992 | 55.1001 | 55.1011 | 55.1021 | 55.1033 | 55.1046 | 55.1059 |
| 20  | 55.0954 | 55.0953 | 55.0953 | 55.0953 | 55.0955 | 55.0958 | 55.0962 | 55.0966 | 55.0972 | 55.0979 | 55.0986 | 55.0995 | 55.1004 | 55.1015 | 55.1026 | 55.1038 |
| 10  | 55.0958 | 55.0954 | 55.0952 | 55.095  | 55.095  | 55.0951 | 55.0952 | 55.0955 | 55.0959 | 55.0964 | 55.097  | 55.0977 | 55.0986 | 55.0995 | 55.1005 | 55.1017 |
| 0   | 55.0962 | 55.0956 | 55.0951 | 55.0947 | 55.0944 | 55.0943 | 55.0942 | 55.0943 | 55.0945 | 55.0949 | 55.0953 | 55.0959 | 55.0966 | 55.0974 | 55.0984 | 55.0994 |
|     | -75     | -65     | -55     | -45     | -35     | -25     | -15     | -5      | 5       | 15      | 25      | 35      | 45      | 55      | 65      | 75      |

X-Axis (mm)

**Figure S17.** The result of the curve fitting from y-axis to x-axis when the collar at location 5. From the results, the predicted location is at (75, 100).

#### **4. The Raw Data of Figure 9 in the Paper**

Because the values of voltage outputs in Figure 9 are not visible, we provide the raw data for each location in this supplementary material. The raw data of location E, L1, L2, R1, and R2 are shown in Figures S18–S22, respectively.

Unit: mV

|             |     |           |          |          |          |          |          |          |          |          |          |          |          |          |          |          |          |
|-------------|-----|-----------|----------|----------|----------|----------|----------|----------|----------|----------|----------|----------|----------|----------|----------|----------|----------|
| Y-Axis (mm) | 100 | 40.776729 | 40.77457 | 40.77257 | 40.77074 | 40.76908 | 40.76758 | 40.76625 | 40.76509 | 40.76409 | 40.76326 | 40.7626  | 40.76211 | 40.76178 | 40.76161 | 40.76162 | 40.76179 |
|             | 90  | 40.775719 | 40.77385 | 40.77214 | 40.77059 | 40.7692  | 40.76796 | 40.76687 | 40.76595 | 40.76518 | 40.76456 | 40.76411 | 40.76381 | 40.76366 | 40.76368 | 40.76385 | 40.76417 |
|             | 80  | 40.775114 | 40.77357 | 40.77216 | 40.77089 | 40.76975 | 40.76876 | 40.76791 | 40.76719 | 40.76662 | 40.76618 | 40.76588 | 40.76572 | 40.7657  | 40.76582 | 40.76608 | 40.76648 |
|             | 70  | 40.774913 | 40.7737  | 40.77261 | 40.77162 | 40.77075 | 40.77    | 40.76936 | 40.76883 | 40.76841 | 40.76811 | 40.76793 | 40.76786 | 40.7679  | 40.76805 | 40.76832 | 40.76871 |
|             | 60  | 40.775118 | 40.77426 | 40.77349 | 40.7728  | 40.77219 | 40.77166 | 40.77121 | 40.77085 | 40.77056 | 40.77036 | 40.77024 | 40.7702  | 40.77024 | 40.77037 | 40.77057 | 40.77086 |
|             | 50  | 40.775728 | 40.77525 | 40.77481 | 40.77442 | 40.77407 | 40.77375 | 40.77349 | 40.77326 | 40.77307 | 40.77293 | 40.77282 | 40.77276 | 40.77274 | 40.77276 | 40.77283 | 40.77293 |
|             | 40  | 40.776742 | 40.77666 | 40.77657 | 40.77648 | 40.77638 | 40.77628 | 40.77617 | 40.77605 | 40.77593 | 40.7758  | 40.77567 | 40.77554 | 40.77539 | 40.77524 | 40.77509 | 40.77493 |
|             | 30  | 40.778162 | 40.7785  | 40.77877 | 40.77898 | 40.77914 | 40.77923 | 40.77926 | 40.77923 | 40.77915 | 40.779   | 40.77879 | 40.77852 | 40.7782  | 40.77781 | 40.77736 | 40.77685 |
|             | 20  | 40.779986 | 40.78076 | 40.7814  | 40.78193 | 40.78233 | 40.78261 | 40.78277 | 40.7828  | 40.78272 | 40.78251 | 40.78218 | 40.78173 | 40.78115 | 40.78045 | 40.77964 | 40.77869 |
|             | 10  | 40.782215 | 40.78344 | 40.78447 | 40.78531 | 40.78596 | 40.78642 | 40.78668 | 40.78676 | 40.78664 | 40.78633 | 40.78583 | 40.78514 | 40.78426 | 40.78319 | 40.78192 | 40.78046 |
|             | 0   | 40.78485  | 40.78655 | 40.78798 | 40.78914 | 40.79003 | 40.79066 | 40.79101 | 40.7911  | 40.79092 | 40.79047 | 40.78976 | 40.78877 | 40.78752 | 40.786   | 40.78421 | 40.78215 |
|             |     | -75       | -65      | -55      | -45      | -35      | -25      | -15      | -5       | 5        | 15       | 25       | 35       | 45       | 55       | 65       | 75       |

X-Axis (mm)

**Figure S18.** The raw data of the location of E; the predicted location of collar is (−5, 0).

Unit: mV

|             |     |           |           |          |          |         |          |          |          |          |          |          |          |          |          |          |          |
|-------------|-----|-----------|-----------|----------|----------|---------|----------|----------|----------|----------|----------|----------|----------|----------|----------|----------|----------|
| Y-Axis (mm) | 100 | 40.768108 | 40.767534 | 40.76699 | 40.76649 | 40.766  | 40.76557 | 40.76517 | 40.76479 | 40.76445 | 40.76415 | 40.76387 | 40.76363 | 40.76343 | 40.76325 | 40.76311 | 40.76301 |
|             | 90  | 40.768608 | 40.768229 | 40.76786 | 40.76749 | 40.7671 | 40.76678 | 40.76644 | 40.7661  | 40.76577 | 40.76544 | 40.76513 | 40.76482 | 40.76452 | 40.76422 | 40.76393 | 40.76365 |
|             | 80  | 40.769032 | 40.768817 | 40.76859 | 40.76834 | 40.7681 | 40.7678  | 40.76751 | 40.76721 | 40.76688 | 40.76655 | 40.7662  | 40.76583 | 40.76545 | 40.76505 | 40.76464 | 40.76421 |
|             | 70  | 40.76938  | 40.769298 | 40.76918 | 40.76904 | 40.7689 | 40.76864 | 40.76839 | 40.76811 | 40.7678  | 40.76746 | 40.76708 | 40.76667 | 40.76622 | 40.76574 | 40.76523 | 40.76469 |
|             | 60  | 40.769651 | 40.769673 | 40.76965 | 40.76958 | 40.7695 | 40.76929 | 40.76908 | 40.76882 | 40.76852 | 40.76817 | 40.76777 | 40.76733 | 40.76683 | 40.7663  | 40.76571 | 40.76508 |
|             | 50  | 40.769846 | 40.769941 | 40.76998 | 40.76996 | 40.7699 | 40.76976 | 40.76958 | 40.76933 | 40.76904 | 40.76869 | 40.76828 | 40.76781 | 40.76729 | 40.76671 | 40.76608 | 40.76539 |
|             | 40  | 40.769965 | 40.770103 | 40.77018 | 40.77019 | 40.7701 | 40.77004 | 40.76988 | 40.76965 | 40.76936 | 40.76901 | 40.7686  | 40.76812 | 40.76759 | 40.76699 | 40.76634 | 40.76562 |
|             | 30  | 40.770007 | 40.770158 | 40.77025 | 40.77027 | 40.7702 | 40.77014 | 40.76998 | 40.76976 | 40.76948 | 40.76913 | 40.76873 | 40.76826 | 40.76773 | 40.76714 | 40.76648 | 40.76577 |
|             | 20  | 40.769974 | 40.770106 | 40.77018 | 40.7702  | 40.7702 | 40.77005 | 40.76989 | 40.76967 | 40.7694  | 40.76906 | 40.76867 | 40.76822 | 40.76771 | 40.76714 | 40.76652 | 40.76583 |
|             | 10  | 40.769863 | 40.769948 | 40.76998 | 40.76996 | 40.7699 | 40.76978 | 40.76961 | 40.76939 | 40.76912 | 40.7688  | 40.76843 | 40.76801 | 40.76753 | 40.76701 | 40.76644 | 40.76581 |
|             | 0   | 40.769677 | 40.769682 | 40.76965 | 40.76958 | 40.7695 | 40.76932 | 40.76913 | 40.76891 | 40.76864 | 40.76834 | 40.768   | 40.76762 | 40.7672  | 40.76674 | 40.76624 | 40.76571 |
|             |     | -75       | -65       | -55      | -45      | -35     | -25      | -15      | -5       | 5        | 15       | 25       | 35       | 45       | 55       | 65       | 75       |

X-Axis (mm)

**Figure S19.** The raw data of the location of L1; the predicted location of collar is (−45, 30).

Unit: mV

|     |           |          |          |          |          |          |          |          |          |          |          |          |          |          |          |          |
|-----|-----------|----------|----------|----------|----------|----------|----------|----------|----------|----------|----------|----------|----------|----------|----------|----------|
| 100 | 40.763128 | 40.76254 | 40.76194 | 40.76133 | 40.76071 | 40.76008 | 40.75944 | 40.7588  | 40.75814 | 40.75748 | 40.7568  | 40.75612 | 40.75543 | 40.75473 | 40.75402 | 40.7533  |
| 90  | 40.76291  | 40.7621  | 40.7613  | 40.7605  | 40.7597  | 40.7589  | 40.75811 | 40.75732 | 40.75654 | 40.75575 | 40.75497 | 40.7542  | 40.75343 | 40.75266 | 40.75189 | 40.75113 |
| 80  | 40.763034 | 40.76207 | 40.76112 | 40.76018 | 40.75927 | 40.75837 | 40.75749 | 40.75663 | 40.75579 | 40.75496 | 40.75416 | 40.75337 | 40.7526  | 40.75185 | 40.75111 | 40.7504  |
| 70  | 40.762868 | 40.7618  | 40.76077 | 40.75976 | 40.75878 | 40.75783 | 40.7569  | 40.75601 | 40.75514 | 40.7543  | 40.75349 | 40.7527  | 40.75195 | 40.75122 | 40.75052 | 40.74985 |
| 60  | 40.762412 | 40.76132 | 40.76025 | 40.75923 | 40.75823 | 40.75727 | 40.75634 | 40.75544 | 40.75458 | 40.75375 | 40.75296 | 40.7522  | 40.75147 | 40.75077 | 40.75011 | 40.74948 |
| 50  | 40.761666 | 40.7606  | 40.75958 | 40.75858 | 40.75762 | 40.7567  | 40.7558  | 40.75495 | 40.75412 | 40.75333 | 40.75257 | 40.75185 | 40.75116 | 40.75051 | 40.74988 | 40.7493  |
| 40  | 40.760629 | 40.75967 | 40.75873 | 40.75783 | 40.75695 | 40.75611 | 40.7553  | 40.75451 | 40.75375 | 40.75303 | 40.75233 | 40.75166 | 40.75103 | 40.75042 | 40.74984 | 40.74929 |
| 30  | 40.759302 | 40.7585  | 40.75772 | 40.75697 | 40.75623 | 40.75551 | 40.75481 | 40.75414 | 40.75348 | 40.75285 | 40.75223 | 40.75164 | 40.75107 | 40.75052 | 40.74998 | 40.74947 |
| 20  | 40.757685 | 40.75711 | 40.75655 | 40.75599 | 40.75544 | 40.7549  | 40.75436 | 40.75383 | 40.75331 | 40.75279 | 40.75228 | 40.75178 | 40.75128 | 40.75079 | 40.75031 | 40.74983 |
| 10  | 40.755777 | 40.7555  | 40.75521 | 40.75491 | 40.7546  | 40.75427 | 40.75393 | 40.75359 | 40.75323 | 40.75285 | 40.75247 | 40.75208 | 40.75167 | 40.75125 | 40.75082 | 40.75038 |
| 0   | 40.75358  | 40.75366 | 40.75371 | 40.75372 | 40.75369 | 40.75363 | 40.75354 | 40.75341 | 40.75324 | 40.75304 | 40.7528  | 40.75253 | 40.75223 | 40.75189 | 40.75151 | 40.7511  |
|     | -75       | -65      | -55      | -45      | -35      | -25      | -15      | -5       | 5        | 15       | 25       | 35       | 45       | 55       | 65       | 75       |

Y-Axis (mm)

X-Axis (mm)

Figure S20. The raw data of the location of L2; the predicted location of collar is (−75, 100).

Unit: mV

|     |           |          |          |          |          |          |          |          |          |          |          |          |          |          |          |          |
|-----|-----------|----------|----------|----------|----------|----------|----------|----------|----------|----------|----------|----------|----------|----------|----------|----------|
| 100 | 40.756236 | 40.75691 | 40.75752 | 40.75807 | 40.75854 | 40.75895 | 40.7593  | 40.75957 | 40.75978 | 40.75992 | 40.76    | 40.76001 | 40.75995 | 40.75982 | 40.75963 | 40.75938 |
| 90  | 40.75708  | 40.75788 | 40.7586  | 40.75924 | 40.75979 | 40.76025 | 40.76063 | 40.76092 | 40.76113 | 40.76126 | 40.76129 | 40.76125 | 40.76112 | 40.7609  | 40.7606  | 40.76021 |
| 80  | 40.757669 | 40.75858 | 40.75939 | 40.76011 | 40.76072 | 40.76124 | 40.76165 | 40.76196 | 40.76218 | 40.7623  | 40.76231 | 40.76223 | 40.76204 | 40.76176 | 40.76138 | 40.7609  |
| 70  | 40.758002 | 40.759   | 40.7599  | 40.76068 | 40.76135 | 40.76191 | 40.76236 | 40.7627  | 40.76292 | 40.76304 | 40.76305 | 40.76295 | 40.76273 | 40.76241 | 40.76197 | 40.76143 |
| 60  | 40.758079 | 40.75915 | 40.76011 | 40.76095 | 40.76167 | 40.76227 | 40.76275 | 40.76312 | 40.76337 | 40.7635  | 40.76351 | 40.7634  | 40.76318 | 40.76284 | 40.76238 | 40.7618  |
| 50  | 40.757901 | 40.75903 | 40.76003 | 40.76091 | 40.76167 | 40.76231 | 40.76283 | 40.76323 | 40.7635  | 40.76366 | 40.76369 | 40.7636  | 40.76339 | 40.76306 | 40.7626  | 40.76203 |
| 40  | 40.757467 | 40.75863 | 40.75966 | 40.76058 | 40.76137 | 40.76205 | 40.7626  | 40.76303 | 40.76334 | 40.76353 | 40.76359 | 40.76354 | 40.76336 | 40.76306 | 40.76264 | 40.7621  |
| 30  | 40.756778 | 40.75795 | 40.75901 | 40.75995 | 40.76077 | 40.76147 | 40.76205 | 40.76252 | 40.76287 | 40.7631  | 40.76322 | 40.76321 | 40.76309 | 40.76285 | 40.7625  | 40.76202 |
| 20  | 40.755833 | 40.757   | 40.75806 | 40.75901 | 40.75985 | 40.76058 | 40.76119 | 40.7617  | 40.7621  | 40.76238 | 40.76256 | 40.76263 | 40.76258 | 40.76243 | 40.76216 | 40.76179 |
| 10  | 40.754633 | 40.75578 | 40.75683 | 40.75777 | 40.75862 | 40.75937 | 40.76002 | 40.76057 | 40.76102 | 40.76137 | 40.76163 | 40.76178 | 40.76184 | 40.76179 | 40.76165 | 40.7614  |
| 0   | 40.753177 | 40.75428 | 40.7553  | 40.75624 | 40.75709 | 40.75785 | 40.75853 | 40.75913 | 40.75964 | 40.76007 | 40.76042 | 40.76068 | 40.76085 | 40.76094 | 40.76095 | 40.76087 |
|     | -75       | -65      | -55      | -45      | -35      | -25      | -15      | -5       | 5        | 15       | 25       | 35       | 45       | 55       | 65       | 75       |

Y-Axis (mm)

X-Axis (mm)

Figure S21. The raw data of the location of R1; the predicted location of collar is (25, 50).

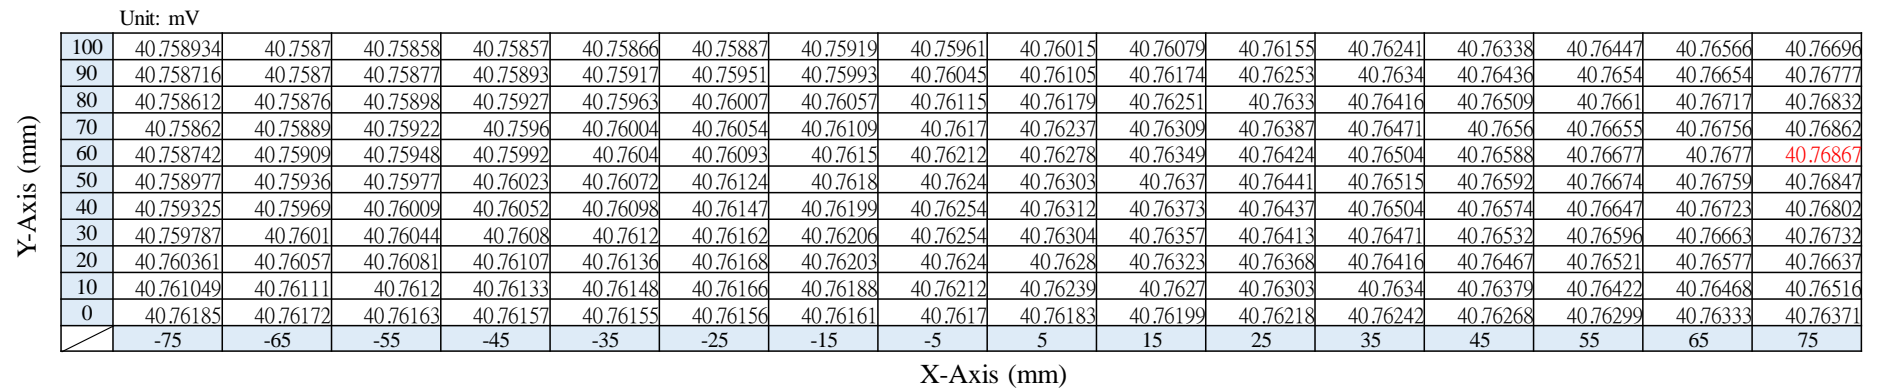

**Figure S22.** The raw data of the location of R2; the predicted location of collar is (75, 60).



## 5. The Evaluation of Minimum Bronchus Which the Probe with Collar is able to Access

To evaluate the bronchus which allows our collar to travel, we survey some lecture for diameters of different bronchus. Researchers reported that diameters of a primary bronchi, secondary bronchi, tertiary bronchi, and bronchioles are about 12.2, 8.3, 5.6, and 4.5 mm, respectively [1]. We summarize the diameter of different bronchus in Table S1. According to their study, the collar in this paper only can reach the secondary bronchi. To reduce the diameter of collar while still remaining the same sensing performance, we are currently studying two methods. The first one method is to investigate different materials owning better sensing response and consequently use the materials to make smaller collars (i.e., to replace the current large silicon-steel collar). We use a nickel sheet and a permalloy (Ni-Fe) sheet to make smaller collars. These sheets and the silicon-steel sheet are compared together by conducting a test to evaluate how these materials influence the voltage output of the receiving electromagnet. As shown in Figure S23, the test setup includes one pair of electromagnets and corresponding measurement electronics (for testing, we only change the materials while other parameters are fixed). Before the testing, we apply ac current with a frequency of 500 Hz to the emitting electromagnet, and subsequently measure the voltage output of the receiving electromagnet by using a lock-in amplifier. This voltage output is used as a background voltage output. After the background voltage is obtained, we put these sheets in the gap between the emitting electromagnet and the receiving electromagnet. After this, we measure the voltage output again and analyze/record the change of voltage output. We use the value of change of voltage output to further calculate change of voltage output per unit volume of material usage. The results are summarized in Table S2. The Table S2 shows that the voltage change per unit volume of material usage is largest for the permalloy sheet (and is about 2.5 time larger than that for silicon-steel sheet). This indicate that we can minimize the diameter of the collar by replacing the silicon steel sheets to permalloy sheets, while still can remaining the same sensing performance.

The second method is to optimize the receiving electromagnets to get a better sensitivity by using theoretical analysis [2]. By optimization, the receiving electromagnets are able to detect smaller changes of magnetic flux which are induced by smaller collars, as we mention in our paper. Due to this, even though the material selection/usage of collar (above paragraph) has reached a limitation of sensitivity increasing, we still can continuously minimize the collar by optimization of the receiving electromagnets. Moreover, if the optimization can be conducted for the receiving electromagnets, emitting coil, and associate parts (from system perspectives), we believe the collar will be significantly miniaturized and thus can reach most bronchioles.

**Table S1.** Typical Diameter of Bronchus.

| Type of Bronchus  | Outer Diameter of Bronchus |
|-------------------|----------------------------|
| Primary Bronchi   | 12.2 mm                    |
| Secondary Bronchi | 8.3 mm                     |
| Tertiary Bronchi  | 5.6 mm                     |
| Bronchioles       | 4.5 mm                     |

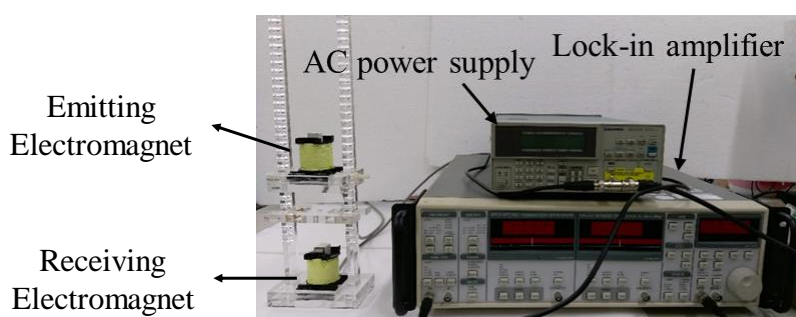

**Figure S23.** The test setup for sensing performance by using different materials for the collar.

**Table S2.** The Summary of the change of voltage output of different materials.

| Material                                                                            | Nickel                | Permalloy<br>(80% Ni, 5% Mo,<br>15% Fe) | Silicon-<br>Steel      |
|-------------------------------------------------------------------------------------|-----------------------|-----------------------------------------|------------------------|
| Volume (mm <sup>3</sup> )                                                           | 10 × 10 ×<br>0.1 = 10 | 10 × 10 × 0.1 = 10                      | 10 × 10 ×<br>0.23 = 23 |
| Background voltage output (mV)                                                      | 68.33                 | 68.86                                   | 68.77                  |
| Change of voltage output (μV)                                                       | 33.62                 | 300.32                                  | 277.99                 |
| Change of Voltage Output per Unit<br>Volume of Material Usage (μV/mm <sup>3</sup> ) | 3.362                 | 30.032                                  | 12.087                 |

## 6. Methods to Improve Our System for Locating the Collar More Accurately

In following, we provide some methods to improve our system for locating the collar more accurately. The first method is increasing diameter of receiving electromagnets. Recently, some researchers reported a theoretical analysis electromagnet-based sensor [2] to estimate the voltage output of an electromagnets. In their paper, the voltage output of an electromagnet-based sensor is below.

$$V = 0.9 \times 10^{-5} \times f \times \frac{l^3}{d^2} \times D_i \times \frac{1}{\ln\left(2 \frac{l}{D_i}\right) - 1} H$$

Where the  $f$  is frequency of magnetic field,  $l$  is the length of the electromagnet,  $d$  is diameter of winding wire,  $D_i$  is the diameter of the ferromagnetic core in the electromagnet. The paper also indicates the optimal diameter of ferromagnetic core is 30% of outer diameter of electromagnets,  $D$ . Thus, we assume that the ratio of core diameter and electromagnet diameter are unchanged, the equation can be written as

$$V = 0.9 \times 10^{-5} \times f \times \frac{l^3}{d^2} \times 0.3D \times \frac{1}{\ln\left(2 \frac{l}{0.3D}\right) - 1} H$$

According to this equation, if the other parameters in above equation are fixed, when the diameter increases, the voltage output also increases. According to this relation, if a small change of magnetic flux induced by the small movement of the collar, the electromagnet with larger diameter is able to convert the small change of magnetic flux into a large change of voltage output. Due to this, the small movement of collar is able to be detected by system and thus the accuracy can be increased.

Second method is increasing the number of electromagnets within the same planar area of the electromagnets-array (i.e., increasing the sensing-resolution). When the amount of receiving electromagnets is increased in the same area, the pitches between each electromagnet in x-axis and y-axis are decreased (i.e., the resolution of sensing are increased). Due to this, the system can record more experimental results along x-axis and y-axis in the same area and consequently use more experimental results to conduct the more accurate regression analysis. More accurate regression analysis can have better analyzed/predicted results to match the experimental results more precisely. That is, the predicted location of the collar can be closer to the actual location of the collar. Hence, the accuracy is increased. According to above reason, either increasing the diameter or number of receiving electromagnets will increase the accuracy.

However, when we increase the diameter of electromagnets, the electromagnets with larger diameters occupy more footprint within the original area of the electromagnet-array (thus x- and y-gaps between the outer-periphery of each electromagnet in the electromagnets-array are decreased). Therefore, when the x- and y- gaps are decreased, the induction-interferences between electromagnets are increased. Moreover, when the diameter of each electromagnet is continuously increased, eventually the number of electromagnets must be decreased in order to be arranged/fitted within the original same area of the electromagnets-array. In this case, decreasing the number of

electromagnets will worsen the targeting resolution (i.e., the targeting system will record less experimental results within the same area). When less experimental results are imported to the signal-process program to conduct curve fitting, the fitting curve will be less accurate and thus the targeting accuracy will be decreased. Due to this reason, we cannot always increase the diameter of the electromagnets. Instead, we have to consider the trade-off issue between the diameter and the number of electromagnets. In addition to above two parameters, it is better to investigate the other parameters influencing the targeting accuracy together at the same time (i.e., considering not only the receiving electromagnets, but also emitting electromagnets, etc) and consequently optimize these parameters from system perspectives. However, optimization of the receiving electromagnets-array (or optimization of the receiving and emitting electromagnets-arrays) from system perspective require a long-term effort. Thus, we do not conduct the optimal design in this manuscript, but we still add above paragraphs describing the influence caused by the diameter and the number of the receiving electromagnets to the targeting accuracy.

The third method is to improve the regression analysis to increase the accuracy. We can use other functions, such as Gauss distribution or higher order polynomial function, to conduct the regression analysis. Due to this, the regression analysis may match the experimental results more accurately. Moreover, in our system, we use 16 points and 11 points to plot the fitting curve along x and y axis, respectively. However, this causes that the fitting curve is not smoothly plotted. Due to this, the actual local-largest-point would not be calculated/plotted in the fitting curve. Instead, we may obtain the second local-largest-point which is just close to the actual local-largest-point. However, when we use more points for calculation, we can plot more points to obtain more smooth-fitting curves. Thus, second local-largest-point may approach more closely to the actual local-largest-point, even when the actual local-largest-point still cannot be calculated and plotted. Due to this, the accuracy is increased. However, when the number of points is increased, the calculation time of signal-processing program is also increased. This results in a time-delay of the targeting. Even though this delay issue can be addressed by improving the signal-processing program, the optimizing signal-processing is not the main research topic in this paper. Due to above reason, we only use 16 points in x-axis at this moment and will optimize the signal-processing program as future work.

## Reference:

1. Michael, G.L.; Chapter 1. Function and Structure of the Respiratory System, In *Pulmonary Physiology*, 8th ed.; McGraw-Hill Companies: New York, NY, USA 2013.
2. Tumanski, S. Induction coil sensors—a review, *Meas. Sci. Technol.* **2007**, *18*, R31-R46.

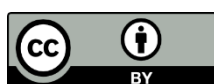

© 2019 by the authors. Licensee MDPI, Basel, Switzerland. This article is an open access article distributed under the terms and conditions of the Creative Commons Attribution (CC BY) license (<http://creativecommons.org/licenses/by/4.0/>).
